# Supplementary material
Source: publisher figshare collection journal article supplement (https://rs.figshare.com/ndownloader/files/14869511)
Supplement: Supplementary file 1 [file 14869511]

## Sheet: SVs shared by sulfidic
Entrez ID	Gene Name	Swissprot Gene	Swissprot Accession	SV type	Individuals	Up or downregulated in sulfidic populations?
106914801	gclc	GSH1	P48506	GAIN	Pich S1, Pich S2, Ixta S, Puya S, Taco S, Puya NS	Upregulated
106929368	slc26a5	S26A5	P58743	GAIN	Pich S1, Pich S2, Puya S, Taco S	Upregulated
106931386	LOC106931386	PKHF1	Q96S99	INV	Pich S1, Pich S2, Puya S, Taco S	Upregulated
106933886	rnf152	RN152	Q8N8N0	DEL	Pich S1, Pich S2, Ixta S, Puya S, Taco S, Pich NS1	Downregulated
106926011	LOC106926011	NLRC3	Q7RTR2	DEL	Pich S2, Ixta S, Puya S, Taco S	Downregulated
106922225	cacna2d4	CA2D4	Q7Z3S7	DEL	Pich S1, Ixta S, Puya S, Taco S
106922250	LOC106922250	NAPEP	Q6IQ20	DEL	Pich S1, Ixta S, Puya S, Taco S
106922293	LOC106922293	NAPEP	Q6IQ20	DEL	Pich S1, Ixta S, Puya S, Taco S
106922299	LOC106922299	NAPEP	Q6IQ20	DEL	Pich S1, Ixta S, Puya S, Taco S
106933776	dlgap2	DLGP2	Q9P1A6	DEL	Pich S1, Ixta S, Puya S, Taco S
106933790	LOC106933790	DLGP2	Q9P1A6	DEL	Pich S1, Ixta S, Puya S, Taco S
106916334	LOC106916334	RON	Q04912	DEL	Pich S1, Ixta S, Puya S, Taco S
106918921	cdh2	CADH2	P19022	DEL	Pich S1, Ixta S, Puya S, Taco S
106921070	mut	MUTA	P22033	GAIN	Pich S1, Ixta S, Puya S, Taco S
106921448	LOC106921448	UB2D3	P61077	INS	Pich S1, Ixta S, Puya S, Taco S
106922987	aplf	APLF	Q8IW19	DEL	Pich S1, Ixta S, Puya S, Taco S
106925778	LOC106925778	ATS3	O15072	GAIN	Pich S1, Ixta S, Puya S, Taco S
106932701	LOC106932701	IQGA3	Q86VI3	DEL	Pich S1, Ixta S, Puya S, Taco S
106904347	slc6a9	SC6A9	P48067	DEL	Pich S1, Ixta S, Puya S, Taco S
106904756	LOC106904756	KMT2A	Q03164	GAIN	Pich S1, Ixta S, Puya S, Taco S
106906838	LOC106906838	REG1B	P48304	GAIN	Pich S1, Ixta S, Puya S, Taco S
106907079	LOC106907079	N/A	N/A	GAIN	Pich S1, Ixta S, Puya S, Taco S
106909469	LOC106909469	RHG17	Q68EM7	DEL	Pich S1, Ixta S, Puya S, Taco S
106909787	LOC106909787	N/A	N/A	DEL	Pich S1, Ixta S, Puya S, Taco S
106909788	LOC106909788	CNTP2	Q9UHC6	DEL	Pich S1, Ixta S, Puya S, Taco S
106911195	LOC106911195	ILRL1	Q01638	DEL	Pich S1, Ixta S, Puya S, Taco S
106911272	LOC106911272	KV404	P06314	GAIN	Pich S1, Ixta S, Puya S, Taco S
106911271	LOC106911271	LAC1	P0CG04	GAIN	Pich S1, Ixta S, Puya S, Taco S
106911275	LOC106911275	IGKC	P01834	GAIN	Pich S1, Ixta S, Puya S, Taco S
106912708	slc31a1	COPT1	O15431	GAIN	Pich S1, Ixta S, Puya S, Taco S
106922225	cacna2d4	CA2D4	Q7Z3S7	DEL	Pich S1, Pich S2, Ixta S, Puya S
106922250	LOC106922250	NAPEP	Q6IQ20	DEL	Pich S1, Pich S2, Ixta S, Puya S
106922293	LOC106922293	NAPEP	Q6IQ20	DEL	Pich S1, Pich S2, Ixta S, Puya S
106922299	LOC106922299	NAPEP	Q6IQ20	DEL	Pich S1, Pich S2, Ixta S, Puya S
106933776	dlgap2	DLGP2	Q9P1A6	DEL	Pich S1, Pich S2, Ixta S, Puya S
106933790	LOC106933790	DLGP2	Q9P1A6	DEL	Pich S1, Pich S2, Ixta S, Puya S
106916334	LOC106916334	RON	Q04912	DEL	Pich S1, Pich S2, Ixta S, Puya S
106918921	cdh2	CADH2	P19022	DEL	Pich S1, Pich S2, Ixta S, Puya S
106921070	mut	MUTA	P22033	GAIN	Pich S1, Pich S2, Ixta S, Puya S
106922987	aplf	APLF	Q8IW19	DEL	Pich S1, Pich S2, Ixta S, Puya S
106925778	LOC106925778	ATS3	O15072	GAIN	Pich S1, Pich S2, Ixta S, Puya S
106932701	LOC106932701	IQGA3	Q86VI3	DEL	Pich S1, Pich S2, Ixta S, Puya S
106904347	slc6a9	SC6A9	P48067	DEL	Pich S1, Pich S2, Ixta S, Puya S
106904756	LOC106904756	KMT2A	Q03164	GAIN	Pich S1, Pich S2, Ixta S, Puya S
106906838	LOC106906838	REG1B	P48304	GAIN	Pich S1, Pich S2, Ixta S, Puya S
106907079	LOC106907079	N/A	N/A	GAIN	Pich S1, Pich S2, Ixta S, Puya S
106909469	LOC106909469	RHG17	Q68EM7	DEL	Pich S1, Pich S2, Ixta S, Puya S
106909787	LOC106909787	N/A	N/A	DEL	Pich S1, Pich S2, Ixta S, Puya S
106909788	LOC106909788	CNTP2	Q9UHC6	DEL	Pich S1, Pich S2, Ixta S, Puya S
106911195	LOC106911195	ILRL1	Q01638	DEL	Pich S1, Pich S2, Ixta S, Puya S
106911272	LOC106911272	KV404	P06314	GAIN	Pich S1, Pich S2, Ixta S, Puya S
106911271	LOC106911271	LAC1	P0CG04	GAIN	Pich S1, Pich S2, Ixta S, Puya S
106911275	LOC106911275	IGKC	P01834	GAIN	Pich S1, Pich S2, Ixta S, Puya S
106912708	slc31a1	COPT1	O15431	GAIN	Pich S1, Pich S2, Ixta S, Puya S
106919051	LOC106919051	DHX35	Q9H5Z1	DEL	Pich S1, Pich S2, Ixta S, Puya S, Taco S
106908903	LOC106908903	OXLA	Q96RQ9	GAIN	Pich S1, Pich S2, Ixta S, Puya S, Taco S
106908550	LOC106908550	RAB6A	P20340	DEL	Pich S1, Pich S2, Ixta S, Puya S, Taco S, Ixta NS
106918719	adgrv1	GPR98	Q8WXG9	DEL	Pich S1, Pich S2, Ixta S, Puya S, Taco S, Ixta NS
106919113	LOC106919113	CYLD	Q9NQC7	GAIN	Pich S1, Pich S2, Ixta S, Puya S, Taco S, Ixta NS
106919213	apaf1	APAF	O14727	GAIN	Pich S1, Pich S2, Ixta S, Puya S, Taco S, Ixta NS
106903909	LOC106903909	N/A	N/A	DEL	Pich S1, Pich S2, Ixta S, Puya S, Taco S, Ixta NS
106903911	LOC106903911	N/A	N/A	DEL	Pich S1, Pich S2, Ixta S, Puya S, Taco S, Ixta NS
106907864	LOC106907864	TECTA	O75443	DEL	Pich S1, Pich S2, Ixta S, Puya S, Taco S, Ixta NS
106910304	LOC106910304	LORF2	O00370	DEL	Pich S1, Pich S2, Ixta S, Puya S, Taco S, Ixta NS
106913878	LOC106913878	SENP5	Q96HI0	DEL	Pich S1, Pich S2, Ixta S, Puya S, Taco S, Pich NS1
106913879	LOC106913879	KALM	P23352	DEL	Pich S1, Pich S2, Ixta S, Puya S, Taco S, Pich NS1
106922810	pak4	PAK4	O96013	GAIN	Pich S1, Pich S2, Ixta S, Puya S, Taco S, Pich NS1
106929175	LOC106929175	TEN1	Q9UKZ4	DEL	Pich S1, Pich S2, Ixta S, Puya S, Taco S, Pich NS1
106903842	LOC106903842	NLRC3	Q7RTR2	DEL	Pich S1, Pich S2, Ixta S, Puya S, Taco S, Pich NS1
106903844	LOC106903844	NLRC3	Q7RTR2	DEL	Pich S1, Pich S2, Ixta S, Puya S, Taco S, Pich NS1
106905445	LOC106905445	ACES	P22303	DEL	Pich S1, Pich S2, Ixta S, Puya S, Taco S, Pich NS1
106906680	LOC106906680	FRRS1	Q6ZNA5	GAIN	Pich S1, Pich S2, Ixta S, Puya S, Taco S, Pich NS1
106907829	ccdc3	CCDC3	Q9BQI4	DEL	Pich S1, Pich S2, Ixta S, Puya S, Taco S, Pich NS1
106910295	LOC106910295	MA7D1	Q3KQU3	DEL	Pich S1, Pich S2, Ixta S, Puya S, Taco S, Pich NS1
106911188	LOC106911188	SPEG	Q15772	DEL	Pich S1, Pich S2, Ixta S, Puya S, Taco S, Pich NS1
106916029	LOC106916029	NLRC3	Q7RTR2	GAIN	Pich S1, Pich S2, Ixta S, Puya S, Taco S, Pich NS2
106922504	LOC106922504	COX5B	P10606	DEL	Pich S1, Pich S2, Ixta S, Puya S, Taco S, Pich NS2
106922502	LOC106922502	PVR	P15151	DEL	Pich S1, Pich S2, Ixta S, Puya S, Taco S, Pich NS2
106927263	LOC106927263	MITF	O75030	DEL	Pich S1, Pich S2, Ixta S, Puya S, Taco S, Pich NS2
106928934	LOC106928934	N/A	N/A	INV	Pich S1, Pich S2, Ixta S, Puya S, Taco S, Pich NS2
106928937	LOC106928937	N/A	N/A	INV	Pich S1, Pich S2, Ixta S, Puya S, Taco S, Pich NS2
106928930	LOC106928930	N/A	N/A	INV	Pich S1, Pich S2, Ixta S, Puya S, Taco S, Pich NS2
106928936	LOC106928936	N/A	N/A	INV	Pich S1, Pich S2, Ixta S, Puya S, Taco S, Pich NS2
106933286	LOC106933286	CA2D3	Q8IZS8	GAIN	Pich S1, Pich S2, Ixta S, Puya S, Taco S, Pich NS2
106906613	inpp5b	I5P2	P32019	DEL	Pich S1, Pich S2, Ixta S, Puya S, Taco S, Puya NS
106918787	LOC106918787	N/A	N/A	DEL	Pich S1, Pich S2, Ixta S, Puya S, Taco S, Puya NS
106925596	LOC106925596	CLC4A	Q9UMR7	DEL	Pich S1, Pich S2, Ixta S, Puya S, Taco S, Puya NS
106925606	LOC106925606	CD209	Q9NNX6	DEL	Pich S1, Pich S2, Ixta S, Puya S, Taco S, Puya NS
106925605	LOC106925605	CLC4A	Q9UMR7	DEL	Pich S1, Pich S2, Ixta S, Puya S, Taco S, Puya NS
106925604	LOC106925604	CLC10	Q8IUN9	DEL	Pich S1, Pich S2, Ixta S, Puya S, Taco S, Puya NS
106927687	LOC106927687	OPRX	P41146	DEL	Pich S1, Pich S2, Ixta S, Puya S, Taco S, Puya NS
106927688	LOC106927688	DBLOH	Q9NR28	DEL	Pich S1, Pich S2, Ixta S, Puya S, Taco S, Puya NS
106909067	cmtm6	N/A	N/A	DEL	Pich S1, Pich S2, Ixta S, Puya S, Taco S, Puya NS
106922936	abcc4	MRP4	O15439	DEL	Pich S1, Pich S2, Ixta S, Puya S, Taco S, TacoNS
106926897	LOC106926897	MMP16	P51512	DEL	Pich S1, Pich S2, Ixta S, Puya S, Taco S, TacoNS
106928917	LOC106928917	PLD3	Q8IV08	DEL	Pich S1, Pich S2, Ixta S, Puya S, Taco S, TacoNS
106932330	fgd4	FGD3	Q5JSP0	GAIN	Pich S1, Pich S2, Ixta S, Puya S, Taco S, TacoNS
106933596	LOC106933596	BNC2	Q6ZN30	DEL	Pich S1, Pich S2, Ixta S, Puya S, Taco S, TacoNS
106916970	LOC106916970	N/A	N/A	GAIN	Pich S1, Pich S2, Puya S, Taco S
106921578	LOC106921578	SYTC	P26639	GAIN	Pich S1, Pich S2, Puya S, Taco S
106924504	pcsk5	PCSK5	Q92824	DEL	Pich S1, Pich S2, Puya S, Taco S
106927299	LOC106927299	N/A	N/A	DEL	Pich S1, Pich S2, Puya S, Taco S
106927300	LOC106927300	N/A	N/A	DEL	Pich S1, Pich S2, Puya S, Taco S
106931387	LOC106931387	PKHF1	Q96S99	INV	Pich S1, Pich S2, Puya S, Taco S
106931575	LOC106931575	SRB4D	Q8WTU2	DEL	Pich S1, Pich S2, Puya S, Taco S
106903431	chl1	NCHL1	O00533	DEL	Pich S1, Pich S2, Puya S, Taco S
106904266	LOC106904266	ZFY16	Q7Z3T8	GAIN	Pich S1, Pich S2, Puya S, Taco S
106904268	ube2l3	UB2L3	P68036	GAIN	Pich S1, Pich S2, Puya S, Taco S
106912233	LOC106912233	HMDH	P04035	GAIN	Pich S1, Pich S2, Puya S, Taco S
106918189	LOC106918189	EFNA1	P20827	DEL	Pich S2, Ixta S, Puya S, Taco S
106918320	LOC106918320	NPDC1	Q9NQX5	DEL	Pich S2, Ixta S, Puya S, Taco S
106921141	LOC106921141	PGRC2	O15173	GAIN	Pich S2, Ixta S, Puya S, Taco S
106922329	gria4	GRIA4	P48058	DEL	Pich S2, Ixta S, Puya S, Taco S
106930937	LOC106930937	NHRF2	Q15599	DEL	Pich S2, Ixta S, Puya S, Taco S
106906125	LOC106906125	NRP1	O14786	DEL	Pich S2, Ixta S, Puya S, Taco S
106910014	LOC106910014	FA26F	Q5R3K3	GAIN	Pich S2, Ixta S, Puya S, Taco S
